# Supplementary material for: Highly efficient and reversible SO2 capture by halogenated carboxylate ionic liquids
Source: Royal Society of Chemistry journal article supplement (doi:10.1039/c5ra09752e), 2015-01-01
Supplement: c5ra09752e1.pdf [file c5ra09752e1.pdf]

## Electronic Supplementary Information

### **Highly efficient and reversible SO<sub>2</sub> capture by halogenated carboxylate ionic liquids**

Guokai Cui,<sup>\*,a</sup> Yanjie Huang,<sup>a</sup> Ruina Zhang,<sup>b</sup> Fengtao Zhang,<sup>a</sup> and

Jianji Wang<sup>\*,a</sup>

<sup>a</sup> Collaborative Innovation Center of Henan Province for Green Manufacturing of Fine Chemicals, Key Laboratory of Green Chemical Media and Reactions, Ministry of Education, School of Chemistry and Chemical Engineering, Henan Normal University, Xinxiang, Henan 453007, China

<sup>b</sup> School of mathematics and information Science, Henan Normal University, Xinxiang, Henan 453007, China

E-mail: [chemcgk@163.com](mailto:chemcgk@163.com) (G. Cui), [jwang@htu.cn](mailto:jwang@htu.cn) (J. Wang)

## NMR and IR data of the typical carboxylate ILs

[P<sub>66614</sub>][C<sub>5</sub>H<sub>11</sub>COO]: <sup>1</sup>H NMR (CDCl<sub>3</sub>): 0.83 (m, 15H, 5×CH<sub>3</sub>), 1.20-1.59 (m, 54H, 27×CH<sub>2</sub>), 2.11 (t, 2H, -CH<sub>2</sub>COO), 2.37 (m, 8H, 4×PCH<sub>2</sub>) ppm; <sup>13</sup>C NMR (CDCl<sub>3</sub>): 14.0, 14.1, 14.2, 18.7, 19.2, 21.7, 21.8, 22.0, 22.4, 22.5, 22.7, 22.8, 27.2, 27.7, 28.4, 29.1, 29.2, 29.4, 29.6, 29.7, 30.5, 30.7, 30.8, 30.9, 31.0, 31.2, 31.3, 31.4, 32.0, 32.5, 39.6, 179.3 (C=O) ppm; IR: 2955, 2923, 2854, 1578, 1465, 1417, 1376, 1301, 1262, 1213, 1162, 1110, 984, 914, 891, 865, 809, 721 cm<sup>-1</sup>.

[P<sub>66614</sub>][2-BrC<sub>5</sub>H<sub>10</sub>COO]: <sup>1</sup>H NMR (DMSO-d<sub>6</sub>): 0.85 (m, 15H, 5×CH<sub>3</sub>), 1.23-1.47 (m, 54H, 27×CH<sub>2</sub>), 2.25 (m, 8H, 4×PCH<sub>2</sub>), 4.55 (t, 1H, -CHBrCOO) ppm; <sup>13</sup>C NMR (DMSO-d<sub>6</sub>): 13.7, 13.8, 14.0, 17.2, 17.3, 17.7, 17.8, 20.5, 20.6, 21.2, 21.8, 21.9, 22.1, 22.3, 27.7, 28.1, 28.7, 29.0, 29.7, 29.8, 29.9, 30.1, 30.2, 30.4, 30.8, 31.3, 34.7, 50.3, 176.0 (C=O) ppm; IR: 2956, 2924, 2855, 1742, 1616, 1465, 1409, 1378, 1301, 1264, 1212, 1188, 1132, 1111, 1093, 1048, 989, 891, 862, 809, 720 cm<sup>-1</sup>

[P<sub>66614</sub>][6-ClC<sub>5</sub>H<sub>10</sub>COO]: <sup>1</sup>H NMR (DMSO-d<sub>6</sub>): 0.85 (m, 12H, 4×CH<sub>3</sub>), 1.23-1.51 (m, 54H, 27×CH<sub>2</sub>), 2.25 (m, 10H, 4×PCH<sub>2</sub>, -CH<sub>2</sub>COO), 3.95 (t, 2H, -CH<sub>2</sub>Cl) ppm; <sup>13</sup>C NMR (DMSO-d<sub>6</sub>): 13.7, 13.8, 14.0, 17.2, 17.3, 17.7, 18.0, 20.5, 20.6, 21.2, 21.8, 21.9, 22.1, 24.0, 26.4, 28.1, 28.4, 28.7, 28.9, 29.0, 29.1, 29.7, 29.9, 30.1, 30.4, 30.8, 31.3, 33.3, 33.6, 43.4, 172.6 (C=O) ppm; IR: 2955, 2924, 2855, 1735, 1580, 1465, 1416, 1378, 1300, 1250, 1214, 1164, 1111, 1043, 988, 891, 862, 811, 721 cm<sup>-1</sup>

[P<sub>66614</sub>][6-BrC<sub>5</sub>H<sub>10</sub>COO]: <sup>1</sup>H NMR (DMSO-d<sub>6</sub>): 0.85 (m, 12H, 4×CH<sub>3</sub>), 1.24-1.49 (m, 54H, 27×CH<sub>2</sub>), 2.26 (m, 10H, 4×PCH<sub>2</sub>, -CH<sub>2</sub>COO), 3.32 (t, 2H, -CH<sub>2</sub>Br) ppm; <sup>13</sup>C NMR (DMSO-d<sub>6</sub>): 13.7, 13.8, 14.0, 17.2, 17.3, 17.7, 17.8, 20.5, 20.6, 21.2, 21.8, 21.9, 22.1, 24.0, 27.8, 28.1, 28.7, 28.9, 29.0, 29.1, 29.7, 29.8, 29.9, 30.1, 30.4, 30.8, 31.3, 32.2, 33.3, 33.5, 174.5(C=O) ppm; IR: 2955, 2924, 2855, 1734, 1579, 1465, 1415, 1378, 1300, 1250, 1214, 1166, 1111, 1044, 988, 891, 862, 811, 720 cm<sup>-1</sup>.

**Table S1.** Physical properties of carboxylate ILs for SO<sub>2</sub> capture.<sup>a</sup>

| Ionic liquid                                                  | d / g cm <sup>-3</sup> | η / cP | T <sub>m</sub> / °C | T <sub>dec</sub> / °C |
|---------------------------------------------------------------|------------------------|--------|---------------------|-----------------------|
| [P <sub>66614</sub> ][C <sub>5</sub> H <sub>11</sub> COO]     | 0.9072                 | 108.0  | -68                 | 240                   |
| [P <sub>66614</sub> ][6-BrC <sub>5</sub> H <sub>10</sub> COO] | 0.9664                 | 293.5  | -63                 | 279                   |
| [P <sub>66614</sub> ][2-BrC <sub>5</sub> H <sub>10</sub> COO] | 0.9642                 | 493.0  | -64                 | 305                   |
| [P <sub>66614</sub> ][6-ClC <sub>5</sub> H <sub>10</sub> COO] | 0.9228                 | 187.6  | -62                 | 277                   |

<sup>a</sup> d is the density and η is the viscosity measured at 25°C. T<sub>m</sub> is the melting point measured from DSC. T<sub>dec</sub> is the decomposition temperature corresponding to a 10% mass loss measured using TGA.

**Table S2.** The effect of water constituent on SO<sub>2</sub> capture by acylamino-based ILs.<sup>a</sup>

| Ionic liquid                                                  | Water loading <sup>b</sup><br>(mole/mole IL) | SO <sub>2</sub> dry<br>(mole/mole IL) | SO <sub>2</sub> wet <sup>b,c</sup><br>(mole/mole IL) |
|---------------------------------------------------------------|----------------------------------------------|---------------------------------------|------------------------------------------------------|
| [P <sub>66614</sub> ][C <sub>5</sub> H <sub>11</sub> COO]     | 1.76                                         | 3.82                                  | 3.28                                                 |
| [P <sub>66614</sub> ][6-BrC <sub>5</sub> H <sub>10</sub> COO] | 2.20                                         | 4.34                                  | 4.20                                                 |
| [P <sub>66614</sub> ][2-BrC <sub>5</sub> H <sub>10</sub> COO] | 1.64                                         | 3.97                                  | 3.83                                                 |
| [P <sub>66614</sub> ][6-ClC <sub>5</sub> H <sub>10</sub> COO] | 1.99                                         | 4.28                                  | 4.11                                                 |

<sup>a</sup> Performed at 20 °C and 1 bar for 30 min. <sup>b</sup> Relative humidity is 100%. <sup>c</sup> Does not include mass of loaded water.

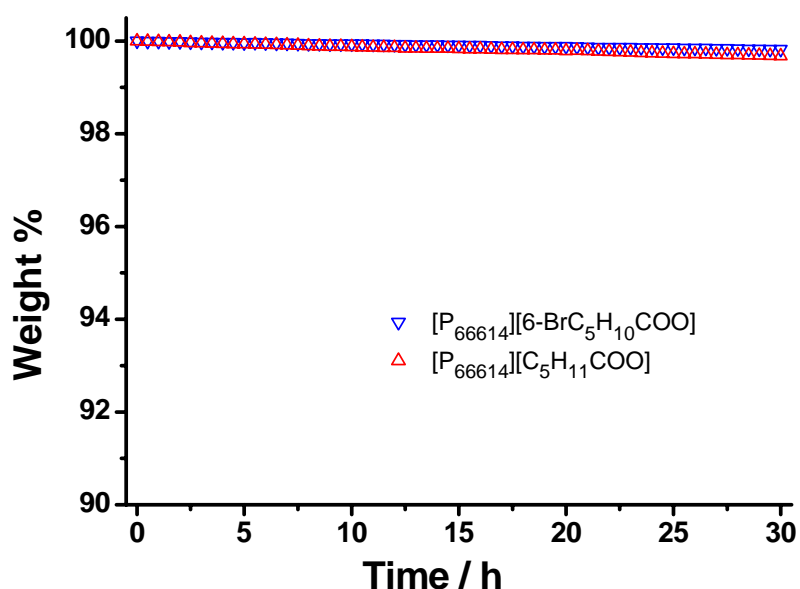**Fig. S1** The thermal stability of [P<sub>66614</sub>][6-BrC<sub>5</sub>H<sub>10</sub>COO] and [P<sub>66614</sub>][C<sub>5</sub>H<sub>11</sub>COO] as a function of time under typical desorption condition (120 °C, 1.0 bar, 60 ml min<sup>-1</sup> N<sub>2</sub>) for 30 h.<sup>1</sup>

**Table S3.** The comparison of SO<sub>2</sub> absorption by anion-functionalized ILs.

| ILs <sup>a</sup>                                              | Temperature/°C  |                         | Available SO <sub>2</sub> absorption at 1 atm <sup>c</sup> | Reference                                   |
|---------------------------------------------------------------|-----------------|-------------------------|------------------------------------------------------------|---------------------------------------------|
|                                                               | Absorption      | Desorption <sup>b</sup> |                                                            |                                             |
| [P <sub>66614</sub> ][6-BrC <sub>5</sub> H <sub>10</sub> COO] | 20              | 120                     | 4.34                                                       | This Work                                   |
| [P <sub>66614</sub> ][4-Br-PhCOO]                             | 20              | 120                     | 4.12                                                       | Wang <sup>2</sup>                           |
| [P <sub>66614</sub> ][BrCH <sub>2</sub> COO]                  | 20              | 120                     | 3.89                                                       | Wang <sup>2</sup>                           |
| [P <sub>66614</sub> ][Tetz]                                   | 20              | 80                      | 3.72                                                       | Wang <sup>3</sup>                           |
| [Emim][SCN]                                                   | 20              | 80                      | 2.99                                                       | Wang <sup>4</sup>                           |
| [K(TX-7)][SCN]                                                | 20              | 80                      | 3.96                                                       | Wang <sup>5</sup>                           |
| [Bmim][BF <sub>4</sub> ]                                      | 20              | 20 <sup>e</sup>         | 1.50                                                       | Riisager <sup>6</sup>                       |
| [Bmim][Tf <sub>2</sub> N]                                     | 20              | 20 <sup>e</sup>         | 1.33                                                       | Riisager <sup>6</sup>                       |
| [TMGBu <sub>2</sub> ][Tf <sub>2</sub> N]                      | 20              | 20 <sup>e</sup>         | 1.52                                                       | Riisager <sup>6</sup>                       |
| [TMG][L]                                                      | 40 <sup>d</sup> | 100                     | 1.34                                                       | Han <sup>7</sup> , Kim <sup>8</sup>         |
| [TMG][PhO]                                                    | 20              | 100 <sup>e</sup>        | 1.78                                                       | Zhang <sup>9</sup>                          |
| [TMG][TE]                                                     | 20              | 100 <sup>e</sup>        | 2.93                                                       | Zhang <sup>9</sup>                          |
| [E <sub>1</sub> mim][MeSO <sub>3</sub> ]                      | 30              | 100                     | 2.30                                                       | Kim <sup>8</sup>                            |
| [Bmim][MeSO <sub>4</sub> ]                                    | 50              | 130 <sup>f</sup>        | 0.98                                                       | Jung <sup>10</sup>                          |
| [Bmim][CH <sub>3</sub> COO]                                   | 25              | 130 <sup>f</sup>        | 1.31                                                       | Shiflett <sup>11</sup> , Jung <sup>10</sup> |

<sup>a</sup>[P<sub>66614</sub>][6-BrC<sub>5</sub>H<sub>10</sub>COO], trihexyl(tetradecyl)phosphonium 6-bromo-*n*-hexanoate;  
[P<sub>66614</sub>][BrCH<sub>2</sub>COO], trihexyl(tetradecyl)phosphonium bromoacetate;  
[P<sub>66614</sub>][4-Br-PhCOO], trihexyl(tetradecyl)phosphonium 4-bromobenzoate;  
[P<sub>66614</sub>][Tetz], trihexyl(tetradecyl)phosphonium tetrazolate;  
[Emim][SCN], 1-ethyl-3-methylimidazolium thiocyanate;  
[K(TX-7)][SCN], 4-nonylphenyl-polyethylene glycol potassium thiocyanate;  
[Bmim][BF<sub>4</sub>], 1-butyl-3-methylimidazolium tetrafluoroborate;  
[Bmim][Tf<sub>2</sub>N], 1-butyl-3-methylimidazolium bis(trifluoromethylsulfonyl)imide;  
[TMGBu<sub>2</sub>][Tf<sub>2</sub>N], tetramethyldibutylguanidium bis(trifluoromethylsulfonyl)imide;  
[TMG][L], 1,1,3,3-tetramethylguanidium lactate;  
[TMG][PhO], 1,1,3,3-tetramethylguanidium phenolate;  
[TMG][TE], 1,1,3,3-tetramethylguanidium trifluoroethylate;  
[E<sub>1</sub>mim][MeSO<sub>3</sub>], 1-ethylene glycol monomethyl ether-3-methylimidazolium methanesulfonate;  
[Bmim][MeSO<sub>4</sub>], 1-butyl-3-methylimidazolium methylsulfate;  
[Bmim][CH<sub>3</sub>COO], 1-butyl-3-methylimidazolium acetate.

**Table S4.** The halogen group in anion-functionalized ILs on SO<sub>2</sub> absorption enthalpies of anion-SO<sub>2</sub> complexes.

| Anion                                    | The absorption enthalpy (kJ mol <sup>-1</sup> ) |                              |                             |
|------------------------------------------|-------------------------------------------------|------------------------------|-----------------------------|
|                                          | $\Delta H_1$ (CO $\cdots$ S)                    | $\Delta H_2$ (CO $\cdots$ S) | $\Delta H_3$ (X $\cdots$ S) |
| [6-BrC <sub>5</sub> H <sub>10</sub> COO] | -102.0                                          | -60.17                       | -13.8                       |
| [6-ClC <sub>5</sub> H <sub>10</sub> COO] | -101.7                                          | -59.3                        | -9.4                        |
| [2-BrC <sub>5</sub> H <sub>10</sub> COO] | -88.3                                           | -56.2                        | -28.3                       |
| [C <sub>5</sub> H <sub>11</sub> COO]     | -102.6                                          | -60.18                       | -                           |

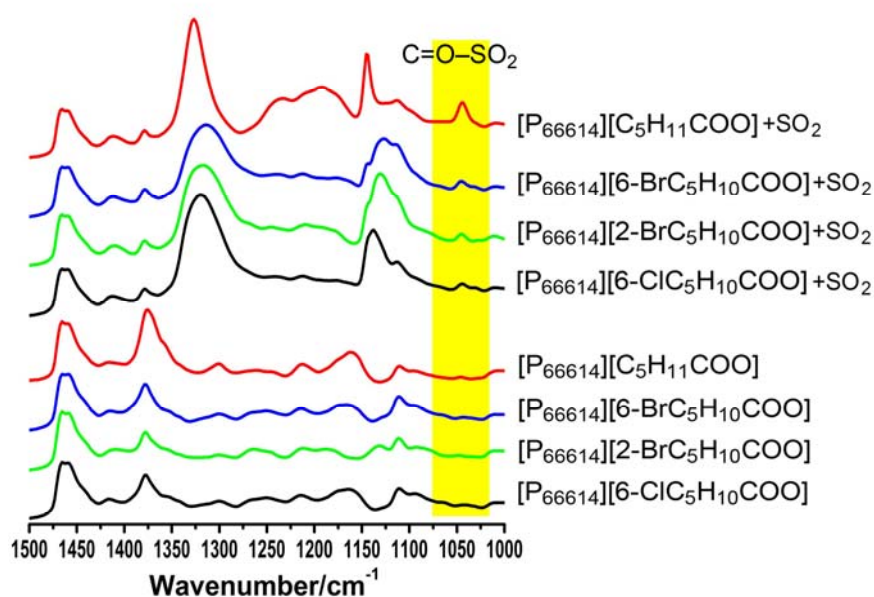

**Fig. S2** The FT-IR spectra of [P<sub>66614</sub>][C<sub>5</sub>H<sub>11</sub>COO], [P<sub>66614</sub>][6-BrC<sub>5</sub>H<sub>10</sub>COO], [P<sub>66614</sub>][2-BrC<sub>5</sub>H<sub>10</sub>COO], and [P<sub>66614</sub>][6-ClC<sub>5</sub>H<sub>10</sub>COO] after the absorption of SO<sub>2</sub> at 20 °C and 1 bar to show the CO $\cdots$ SO<sub>2</sub> interactions clearly.

### References:

- (1) Ren, J.; Wu, L.; Li, B.-G. *Ind. Eng. Chem. Res.* **2013**, *52*, 8565.
- (2) Cui, G.; Zheng, J.; Luo, X.; Lin, W.; Ding, F.; Li, H.; Wang, C. *Angew. Chem., Int. Ed.* **2013**, *52*, 10620.
- (3) Wang, C. M.; Cui, G. K.; Luo, X. Y.; Xu, Y. J.; Li, H. R.; Dai, S. *J. Am. Chem. Soc.* **2011**, *133*, 11916.
- (4) Wang, C.; Zheng, J.; Cui, G.; Luo, X.; Guo, Y.; Li, H. *Chem. Commun.* **2013**, *49*, 1166.
- (5) Ding, F.; Zheng, J.; Chen, Y.; Chen, K.; Cui, G.; Li, H.; Wang, C. *Ind. Eng. Chem. Res.* **2014**, *53*, 18568.
- (6) Huang, J.; Riisager, A.; Wasserscheid, P.; Fehrmann, R. *Chem. Commun.* **2006**, 4027.
- (7) Wu, W. Z.; Han, B. X.; Gao, H. X.; Liu, Z. M.; Jiang, T.; Huang, J. *Angew. Chem., Int. Ed.* **2004**, *43*, 2415.
- (8) Hong, S. Y.; Im, J.; Palgunadi, J.; Lee, S. D.; Lee, J. S.; Kim, H. S.; Cheong, M.; Jung, K. D. *Energy Environ. Sci.* **2011**, *4*, 1802.
- (9) Shang, Y.; Li, H. P.; Zhang, S. J.; Xu, H.; Wang, Z. X.; Zhang, L.; Zhang, J. M. *Chem. Eng. J.* **2011**, *175*, 324.
- (10) Lee, K. Y.; Gong, G. T.; Song, K. H.; Kim, H.; Jung, K. D.; Kim, C. S. *Int. J. Hydrogen Energy* **2008**, *33*, 6031.
- (11) Shiflett, M. B.; Yokozeki, A. *Ind. Eng. Chem. Res.* **2010**, *49*, 1370.
